# Supplementary material
Source: publisher figshare collection journal article supplement (https://karger.figshare.com/ndownloader/files/8955901)
Supplement: Supplementary file 1 [file 8955901]

## Erratum

---

---

A spelling error occurred in the article: Umemoto et al: Intra-Operative Damage to the Pelvic Diaphragm Musculature and Difficulty in Exposure of the Urethra Are Risk Factors of Postoperative Urinary Incontinence after Laparoscopic Radical Prostatectomy: Review of Surgical Video. *Curr Urol* 2011;5:185–189. The third author Yoshiyuki Kojim should read Yoshiyuki Kojima.
